# Supplementary material
Source: publisher site journal article supplement (https://www.degruyterbrill.com/publication/isbn/9783486710755/downloadAsset/9783486710755_Leseprobe.pdf)
Supplement: Supplementary file 1 [file 9783486710755_Leseprobe.pdf]

### **Definition 2.9**

Blockanlagen sind spezielle Versuchsanlagen zur Reduzierung des Einflusses von Störfaktoren durch Blockbildung. Eine relativ homogene Gruppe von Versuchseinheiten heißt ein Block. Wir sagen, dass ein Block vollständig ist, wenn jede der  $v$  Behandlungen zumindest einmal in diesem Block auftritt, sonst heißt der Block unvollständig. Eine Blockanlage heißt vollständig, wenn alle ihre Blocks vollständig sind und sie heißt unvollständig, wenn zumindest einer ihrer Blocks unvollständig ist.

## 2.5 Randomisierung

Unter Randomisierung versteht man die zufällige Auswahl von Stichprobeneinheiten aus einer Grundgesamtheit also die Zufallsauswahl aber vor allem bei Versuchen die zufällige Zuordnung von Versuchseinheiten oder Blocks zu den Behandlungen. Wie bereits oben erwähnt, dient die Randomisierung dazu, die Wahrscheinlichkeit von Verzerrungen bei einer Erhebung oder der Vermengung der zu beobachteten Behandlungseffekte mit Effekten bekannter oder unbekannter Störfaktoren so klein wie nur möglich zu halten. Die Randomisierung ist allgemeiner gesagt vor allem deshalb unumgänglich, um zu gewährleisten, dass statistische Modelle, die die Basis für alle Planungen und Auswertungen darstellen, den Sachverhalt bei Versuchen möglichst adäquat widerspiegeln.

### 2.5.1 Randomisierung bei Erhebungen - Zufallsauswahl

Wir wollen hier kurz beschreiben, wie die zufällige Auswahl von Elementen einer Grundgesamtheit praktisch durchgeführt werden kann. Das geschieht durch die Anwendung von Zufallsstichprobenverfahren. Dabei kommt es darauf an, dass Vorinformationen über mögliche Strukturierungen der Grundgesamtheit vorliegen und wie diese zu nutzen sind.

Angenommen, das Durchschnittseinkommen eines Landes ist zu ermitteln. Dann hängt es von der genauen Aufgabenstellung ab, ob bekannte Strukturen in der Gesellschaft bei der Planung der Erhebung zu berücksichtigen sind. Faktoren wie Geschlecht, Altersgruppe, Schulbildung könnten analog zu den Behandlungsfaktoren von Interesse sein und die Erhebung würde dann innerhalb der Faktorstufen bzw. -stufenkombinationen zu planen und durchzuführen sein. Soll aber lediglich das mittlere Einkommen des Landes ermittelt werden und dies nicht über eine Vollerhebung sondern an Hand einer Stichprobenerhebung geschehen, so muss man dafür sorgen, dass in solch einer Stichprobe möglichst nicht nur oder vorwiegend Personen einer Strukturgruppe enthalten sind. *Möglichst* bedeutet dabei, mit hoher Wahrscheinlichkeit. Zufallsstichprobenverfahren können extreme und das Ergebnis stark verzerrende Stichproben auch nicht vermeiden, sie machen aber die Wahrscheinlichkeit ihres Auftretens vertretbar klein.

#### Definition 2.10

Aus einer Grundgesamtheit vom Umfang  $N$  ist eine Stichprobe (Teilgesamtheit) verschiedener Elemente vom Umfang  $n < N$  zu entnehmen. Jede Vorschrift zur Entnahme einer solchen Stichprobe, bei der jedes der  $N$  Elemente der Grundgesamtheit die gleiche Wahrscheinlichkeit besitzt, Element der Stichprobe zu werden, heißt Zufallsstichprobenverfahren, eine damit gezogene Stichprobe heißt

Zufallsstichprobe ohne Zurücklegen. Haben alle  $\binom{N}{n}$  möglichen Teilmengen die

gleiche Wahrscheinlichkeit  $\frac{1}{\binom{N}{n}}$ , zur Stichprobe zu werden, so spricht man von

einem reinen oder uneingeschränkten Zufallsstichprobenverfahren.

Ob eine Stichprobe eine Zufallsstichprobe ist oder nicht, kann man ihr nicht ansehen. Man muss vielmehr das Verfahren betrachten, mit dem sie gezogen wurde. Allerdings wird man sofort misstrauisch, wenn extreme Stichproben auftreten. Wird aus einer Grundgesamtheit mit 10000 Losen, der Hauptgewinn beim Kauf eines Loses gezogen, so ist das schon ungewöhnlich, kann aber, wie man im Volksmund sagt, schon mit rechten Dingen zugegangen sein, in unserer Terminologie also das Ergebnis eines Zufallsstichprobenverfahrens sein. Zieht dieselbe Person an drei aufeinanderfolgenden Verlosungen den Hauptgewinn und stellt sich dann noch heraus, dass es sich um den Bruder des Losverkäufers handelt, stellen sich berechnete Zweifel ein. Wir weigern uns, Ereignisse mit solch geringer Wahrscheinlichkeit zu akzeptieren und vermuten, dass das zugrunde gelegte Modell falsch ist. In diesem Fall nehmen wir an, dass kein Zufallsstichprobenverfahren zugrundegelegt wurde und Betrug im Spiel ist. Trotzdem besteht eine ganz geringe Wahrscheinlichkeit für dieses Ereignis als Ergebnis eines Zufallsstichprobenverfahrens, nämlich  $1/1000\ 000\ 000\ 000$ .

Nebenbei bemerkt bildet diese Art, Modelle (Sachverhalte) zu verwerfen, unter denen ein beobachtetes Ereignis eine sehr kleine Wahrscheinlichkeit hat und statt dessen solche Modelle zu akzeptieren, bei denen die Wahrscheinlichkeit dieses Ereignisses größer ist, die Basis für die statistischen Tests in den folgenden Kapiteln.

Für die praktische Realisierung eines Zufallsstichprobenverfahrens gibt es mehrere Möglichkeiten. Existiert eine Liste mit allen Elementen der Grundgesamtheit, die sogenannte Auswahlgrundlage, so kann man mit Hilfe eines Zufallszahlengenerators die Zufallsauswahl vornehmen. In älteren Lehrbüchern findet man auch noch Tabellen mit Zufallszahlen und Hinweise zu ihrer Nutzung (z.B. was zu tun ist, wenn eine Zahl abgelesen wird, die es in der Grundgesamtheit nicht gibt).

Eine mitunter praktisch einfacher zu realisierende Methode ist die systematische Auswahl mit Zufallsstart. Sie ist anwendbar, wenn die Elemente der Auswahlgrundlage von 1 bis  $N$  durchnummeriert sind und die Folge nicht mit dem Merkmal zusammenhängt. Wenn  $N/n$  ganzzahlig ist, wählt man zufällig eine Zahl  $i$  zwischen 1 und  $N/n$  aus und bildet die Stichprobe aus den Elementen  $i, N/n + i, 2N/n + i, \dots, (n-1)N/n + i$  der Stichprobe zu. Näheres hierzu und was zu tun ist, wenn  $N/n$  nicht ganzzahlig ist siehe VB 1/31/1210.

### Beispiel 2.5

Eine Grundgesamtheit umfasse  $N = 100$  Elemente, es soll eine Zufallsstichprobe ohne Zurücklegen vom Umfang  $n = 5$  gezogen werden. Bei einer uneingeschränkten Zufallsauswahl wird jedes der Elemente mit der Wahrscheinlichkeit 0,05 gezogen. (Nehmen wir z.B. das Element 8, es wird im ersten Zug mit Wahrscheinlichkeit  $1/100$  gezogen bzw. mit Wahrscheinlichkeit  $99/100$  nicht gezogen. Die Wahrscheinlichkeit, dass es im 2. Zug gezogen wird ist gleich  $99/100 \cdot 1/99$  und das ist ebenfalls 0,01 usw. bis zum 5. Zug, die Summe der 5 Werte ergibt die Gesamtwahrscheinlichkeit, in die Stichprobe zu gelangen).

Wählen wir nun zufällig eine Zahl zwischen 1 und  $100/5 = 20$ , z.B. 12 aus, so gelangen bei systematischer Auswahl mit Zufallsstart die Elemente 12, 32, 52, 72 und 92 in die Stichprobe. Jedes Element der Grundgesamtheit hat wieder die Wahrscheinlichkeit  $1/20$  in die Stichprobe zu gelangen.

In beiden Fällen handelt es sich um ein Zufallsstichprobenverfahren aber nur im ersten Fall um ein uneingeschränktes.

Wir wollen mit Hilfe des PC-Programms *CADEMO-light*, das wir im folgenden kurz CL nennen an diesem Beispiel demonstrieren, wie man mit diesem Programm Zufallsstichproben ohne Zurücklegen ziehen kann. Im CL-Eingangsmenü der Abbil-

dung 2.1 wählt man dazu den Zweig "Versuchsanlagen" und dann den Zweig "Vollständig randomisierte Anlage".

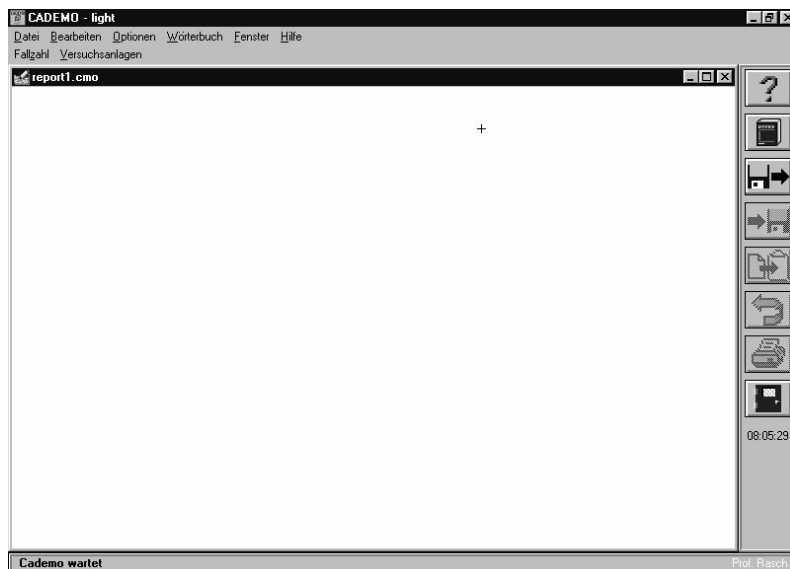

Abbildung 2.1 Das Startbild von CADEMO-light

Im folgenden Eingabefenster wurde eingetragen, dass wir 100 Einheiten zwei Behandlungen zuordnen wollen.

Randomisation in einfachen Versuchsanlagen

Die Behandlungen werden den Versuchseinheiten zufällig zugeordnet. Dabei wird davon ausgegangen, daß prinzipiell jede Behandlung jeder Versuchseinheit zugeordnet werden kann.

Parameter

Anzahl der Versuchseinheiten  $n$  = 100

Anzahl der Behandlungen  $v$  = 2

Bezeichnungen

Versuchseinheiten

Behandlungen

☒ Die Anzahl der Versuchseinheiten je Behandlung möchten Sie selbst festlegen.

☒ OK

☒ Abbruch

☒ Hilfe

Abbildung 2.2 Das Eingabefenster für das Randomisieren

Die beiden Behandlungen bezeichnen wir mit "Stichprb" für Stichprobe bzw. mit "Rest". Nach Aktivierung der Möglichkeit, die Anzahlen für diese beiden Behandlungen festzulegen (5 in die Stichprobe, 95 in den Rest), muss man die Zahlen 5 und 95 eingeben. Ein Ergebnis findet man in Abbildung 2.3, es ist beim nächsten CL-Start mit hoher Wahrscheinlichkeit verschieden.

| Zuordnungstabelle |                   |    |    |    |     |
|-------------------|-------------------|----|----|----|-----|
| Behandlungen      | Versuchseinheiten |    |    |    |     |
| 1Stichprb         | 16                | 53 | 58 | 87 | 89  |
| 2Rest             | 1                 | 2  | 3  | 4  | 5   |
|                   | 6                 | 7  | 8  | 9  | 10  |
|                   | 11                | 12 | 13 | 14 | 15  |
|                   | 17                | 18 | 19 | 20 | 21  |
|                   | 22                | 23 | 24 | 25 | 26  |
|                   | 27                | 28 | 29 | 30 | 31  |
|                   | 32                | 33 | 34 | 35 | 36  |
|                   | 37                | 38 | 39 | 40 | 41  |
|                   | 42                | 43 | 44 | 45 | 46  |
|                   | 47                | 48 | 49 | 50 | 51  |
|                   | 52                | 54 | 55 | 56 | 57  |
|                   | 59                | 60 | 61 | 62 | 63  |
|                   | 64                | 65 | 66 | 67 | 68  |
|                   | 69                | 70 | 71 | 72 | 73  |
|                   | 74                | 75 | 76 | 77 | 78  |
|                   | 79                | 80 | 81 | 82 | 83  |
|                   | 84                | 85 | 86 | 88 | 90  |
|                   | 91                | 92 | 93 | 94 | 95  |
|                   | 96                | 97 | 98 | 99 | 100 |
|                   |                   |    |    |    | +   |

**Abbildung 2.3** Ergebnisfenster mit einer Zufallsstichprobe vom Umfang 5

Wir wollen hier noch einen weiteren Typ eingeschränkter Zufallsstichprobenverfahren definieren. Weitere Verfahren, wie z.B. das für Erhebungen auf Flächen geeignete Liniestichprobenverfahren findet man in VB, Komplex 1/31.

### Definition 2.11

Zerfällt die Grundgesamtheit vom Umfang  $N$  auf natürliche Weise in  $s$  Teilgesamtheiten vom Umfang  $N_1, N_2, \dots, N_s$  oder wird sie nach den Stufen eines vermuteten Störfaktors in solche Teilgesamtheiten unterteilt, so bezeichnet man die Teilgesamtheiten als Schichten. Als geschichtete Stichprobenauswahl bezeichnet man Erhebungen, bei denen sich die Gesamtstichprobe aus Teilstichproben vom Umfang  $n_i$  ( $i = 1, \dots, s$ ) der  $s$  Schichten zusammensetzt. Die Größen  $n_i / N_i$  heißen Schichtgewichte. Geschichtete Stichprobenauswahl kann ein Zufallsstichprobenverfahren sein oder auch (manchmal gewollt) nicht (z.B. bei unterschiedlichen Erhebungskosten in den Schichten sind kostenoptimale geschichtete Stichprobenverfahren oft keine Zufallsstichprobenverfahren, da Elemente in den billiger zu erfassenden Schichten eine höhere Auswahlwahrscheinlichkeit haben als andere Elemente). Ein geschichtetes Zufallsstichprobenverfahren erhält man, wenn man in den Schichten mit einer Wahrscheinlichkeit proportional zu ihrer Größe ein reines Zufallsstichprobenverfahren anwendet d.h. wenn alle Schichtgewichte gleich groß sind.

### Beispiel 2.5 - Fortsetzung

Nehmen wir an, die in Beispiel 2.5 beschriebene Grundgesamtheit bestehe aus  $N_1 = 60$  Frauen und  $N_2 = 40$  Männern. Damit hat man zwei natürliche Schichten mit dem Größenverhältnis 3:2. Durch jeweils reine Zufallsauswahl wählt man nun  $n_1 = 3$  weibliche und  $n_2 = 2$  männliche Personen aus. Jede Person der Grundgesamtheit hat wieder die Wahrscheinlichkeit  $3/60 = 2/40 = 0,05$ , in die Stichprobe zu gelangen.

### 2.5.2 Randomisierung in Versuchsanlagen - zufällige Zuordnung

Ebenso wie bei den Stichprobenverfahren unterscheiden wir auch bei den Versuchsanlagen reine und eingeschränkte Formen der Randomisierung. Wir setzen zunächst voraus, dass unser Versuchsmaterial nicht strukturiert ist, dass also keine Blocks betrachtet werden.

#### Definition 2.12

Falls in einer Versuchsanlage lediglich genau  $n_i$  Versuchseinheiten zufällig der  $i$ -ten von  $v$  Behandlungen ( $\sum n_i = N$ ) zuzuordnen sind, nennen wir dies eine vollständige oder uneingeschränkte Randomisierung und wir nennen die Versuchsanlage eine einfache oder eine vollständig randomisierte Versuchsanlage.

Praktisch kann man die Versuchseinheiten durch Zahlen charakterisieren, z.B. durch 1 bis  $N$ . Dann wählt man nach einem reinen Zufallstichprobenverfahren eine Zahl zwischen 1 und  $N$  zufällig aus und ordnet die entsprechende Versuchseinheit der Behandlung 1 zu. Aus den verbleibenden  $N-1$  Zahlen wählt man wieder eine zufällig aus und ordnet die entsprechende Versuchseinheit der Behandlung 1 zu, falls  $n_1 \geq 2$ . Dies setzt man solange fort, bis  $n_1$  Versuchseinheiten der Behandlung 1 zugeordnet wurden. Auf dieselbe Weise werden die  $n_2$  Versuchseinheiten für Behandlung 2 ausgewählt und so fort bis die Versuchseinheiten für  $v-1$  Behandlungen festliegen. Die restlichen Versuchseinheiten gehören dann automatisch zur Behandlung  $v$ .

### Beispiel 2.6

Aus einer Grundgesamtheit männlicher Kälber eines bestimmten Alters wurden 16 zufällig ausgewählt. Von diese  $N = 16$  Tieren sollen in einem Fütterungsversuch je 4 mit einem von 4 Futtermitteln gefüttert werden. Wir bezeichnen die  $v = 4$  Futtermittel mit 1, 2, 3 und 4. Als Merkmal soll die durchschnittliche tägliche Zunahme in g/Tag im Laufe einer Woche ermittelt werden. Falls die 16 Kälber von 1 bis 16 durchnummeriert werden, liefert uns der Zweig Versuchsanlagen von CL, wenn wir in Abbildung 2.2 jetzt  $N = 16$  und  $v = 4$  setzen als Standard eine gleichmäßige Aufteilung der 16 Kälber auf die 4 Futtermittelgruppen (in Abbildung 2.2 die Werte 16 und 4 eingeben), und den Schalter für eigene Vorgabe der Aufteilung nicht aktivieren). Ein mögliches Ergebnis zeigt Abbildung 2.4.

**Entscheidung:**

Art der Versuchsanlage ist bekannt  
 vollständig randomisierte Versuchsanlage  
 Versuchseinheiten möglichst gleich auf die  
 Behandlungen verteilen

Zuordnungstabelle

| Behandlungen | Versuchseinheiten |    |    |    |
|--------------|-------------------|----|----|----|
| 1            | 2                 | 4  | 13 | 15 |
| 2            | 1                 | 5  | 8  | 10 |
| 3            | 3                 | 6  | 7  | 14 |
| 4            | 9                 | 11 | 12 | 16 |

**Abbildung 2.4** Zufällige Zuordnung von 16 Versuchseinheiten  
 auf 4 Behandlungen

In Blockanlagen ist die Randomisierung wie folgt durchzuführen: Die Versuchseinheiten in jedem Block sind zufällig den Behandlungen, die in diesem Block auftreten, zuzuweisen. Dabei wird das in 2.5.1 beschriebene Verfahren für jeden Block einzeln angewendet; wir müssen lediglich  $N$  in 2.5.1 durch die Blockgröße  $k$  und  $v$  durch die Anzahl der im Block auftretenden Behandlungen ersetzen.

Für vollständige Blockanlagen mit  $v$  Versuchseinheiten pro Block von denen jede genau einer der  $v$  Behandlungen zugeordnet wird, ist die Randomisierung damit beendet. Anders verhält es sich im Fall  $k < v$ . Bei unvollständigen Blockanlagen sind die abstrakten Blocks, wie sie durch die mathematische Konstruktion (etwa mit dem CL-Programm) entstehen, den realen Blocks zufällig zuzuordnen, dies geschieht ebenfalls mit dem in 2.5.1 beschriebenen Verfahren für  $N = v = b$ , wobei  $b$  die Anzahl der Blocks bezeichnet.

**Beispiel 2.4 - Fortsetzung**

Der Fall 1 von Beispiel 2.4 mit  $v = 2$  Arten von Augentropfen  $A$  und  $B$  erfordert lediglich die zufällige Zuordnung von  $A$  zu einem der beiden Augen.

Im zweiten Fall waren  $v = 5$  Behandlungen in 10 Blocks vom Umfang 2 anzuordnen. Es ergaben sich die abstrakten Blocks der unvollständigen Blockanlage in Tabelle 2.2, deren 10 Behandlungskombinationen sind zunächst zufällig den 10 Patienten zuzuordnen, anschließend sind für jeden Patienten die entsprechenden Behandlungen zufällig auf das linke und rechte Auge zu verteilen.

## 2.6 Blockanlagen

### 2.6.1 Grundbegriffe

Zur Beschreibung von Blockanlagen definieren wir eine *Inzidenzmatrix*.

#### Definition 2.13

Eine *Inzidenzmatrix*  $N = (n_{ij})$  ist ein rechteckiges Schema mit  $v$  Zeilen und  $b$  Spalten angefüllt mit ganzen Zahlen  $n_{ij}$ , die angeben, wie oft die  $i$ -te Zeile repräsentierende  $i$ -te Behandlung im die  $j$ -te Spalte definierenden  $j$ -ten Block auftritt. Sind alle  $n_{ij}$  entweder 0 oder 1 so heißen Inzidenzmatrix und die ihr entsprechende Blockanlage *binär*.

Die Elemente der Inzidenzmatrix einer vollständigen Blockanlage sind folglich alle positiv ( $n_{ij} \geq 1$ ), in einer unvollständigen Blockanlage hat die Inzidenzmatrix wenigstens eine Null, sind alle Blocks unvollständig, so steht wenigstens eine Null in jeder Spalte.

Vor allem bei unvollständigen Blockanlagen ist es sinnvoll, anstelle der Inzidenzmatrix eine Kompaktschreibweise zur Charakterisierung zu verwenden. Dabei entspricht jedem Block ein Klammersausdruck, in dem die Nummern der im Block enthaltenen Behandlungen stehen.

#### Beispiel 2.7

Eine Blockanlage mit  $v = 4$  Behandlungen und  $b = 6$  Blocks sei durch folgende Inzidenzmatrix definiert:

$$\begin{pmatrix} 1 & 0 & 1 & 0 & 0 & 0 \\ 0 & 1 & 0 & 1 & 1 & 1 \\ 1 & 0 & 1 & 0 & 0 & 0 \\ 0 & 1 & 0 & 1 & 1 & 1 \end{pmatrix}$$

Da diese Matrix Nullen enthält, handelt es sich um eine unvollständige Blockanlage. In Kompaktschreibweise lässt sie sich in der Form  $(1,3), (2,4), (1,3), (2,4), (2,4), (2,4)$  schreiben. Wie vereinbart repräsentiert z.B. die erste Klammer Block 1, in dem die Behandlungen 1 und 3 auftreten, da die den ersten Block definierende Spalte eine 1 in den Zeilen 1 und 3 hat und diese entsprechen den Behandlungen 1 und 3.

#### Definition 2.14

Eine Blockanlage mit symmetrischer Inzidenzmatrix heißt symmetrische Blockanlage. Treten in einer Blockanlage alle Behandlungen gleich oft auf, d.h. ist die Anzahl der Wiederholungen  $r_i = r$ , so heißt diese Anlage wiederholungsgleich. Ist in einer Blockanlage die Anzahl der Versuchseinheiten je Block gleich, so heißt diese Anlage blockgleich. Die Anzahl der Versuchseinheiten im  $j$ -ten Block wird mit  $k_j$  bezeichnet, für blockgleiche Anlagen gilt damit  $k_j = k$ .

Man kann nun leicht einsehen, dass sowohl die Summe aller Wiederholungen  $r_i$  als auch die Summe aller Blockgrößen  $k_j$  gleich der Anzahl der Versuchseinheiten einer Blockanlage sein muss. Damit gilt für jede Blockanlage:



$$\sum_{i=1}^v r_i = \sum_{j=1}^b k_j = N \quad (2.4)$$

Speziell folgt daraus für wiederholungs- und blockgleiche Blockanlagen ( $r_i = r$  und  $k_j = k$ ):

$$vr = bk \quad (2.5)$$

In symmetrischen Blockanlagen ist  $b = v$  und  $r_i = k_i$  ( $i = 1, \dots, v$ ).

### Definition 2.15

Eine unvollständige Blockanlage ist zusammenhängend falls es für jedes Paar  $(A_k, A_l)$  von Behandlungen  $A_1, \dots, A_v$  eine Kette von Behandlungen gibt, die mit  $A_k$  beginnt und mit  $A_l$  endet, so dass aufeinander folgende Behandlungen in dieser Kette in mindestens einem Block gemeinsam auftreten. Anderenfalls heißt die Blockanlage unzusammenhängend.

Diese Definition erscheint sehr abstrakt und ihre Bedeutung mag nicht klar sein. Die Eigenschaft "zusammenhängend" ist aber von großer Bedeutung für die Auswertung. Unzusammenhängende Blockanlagen können nämlich nicht als Ganzes ausgewertet werden, sie werden wie 2 oder mehr unabhängigen Versuchsanlagen ausgewertet.

### Beispiel 2.7 - Fortsetzung

In der Anlage des Beispiels 2.7 treten z.B. die erste und die zweite Behandlung nicht gemeinsam in einem der 6 Blocks auf. Zwischen ihnen lässt sich auch keine Behandlungskette im Sinne von Definition 2.15 finden, folglich ist die Anlage eine unzusammenhängende Blockanlage. Was dies bedeutet, wird deutlich, wenn wir die Blocks und die Behandlungen unnummerieren oder, was auf das gleiche hinausläuft, die Spalten und die Zeilen der Inzidenzmatrix geeignet vertauschen. Wir vertauschen die Blocks 2 und 3 und die Behandlungen 1 und 4. In der Inzidenzmatrix vertauschen sich damit die Spalten 2 und 3 und die Zeilen 1 und 4. Das Ergebnis ist die folgende Matrix:

$$\begin{pmatrix} 0 & 0 & 1 & 1 & 1 & 1 \\ 0 & 0 & 1 & 1 & 1 & 1 \\ 1 & 1 & 0 & 0 & 0 & 0 \\ 1 & 1 & 0 & 0 & 0 & 0 \end{pmatrix}$$

Man sieht nun, dass diese Versuchsanlage aus zwei Anlagen mit zwei getrennten Teilmengen von Behandlungen besteht. In der ersten Anlage haben wir 2 Behandlungen (1 und 2) in 4 Blocks. In der zweiten Anlage 2 weitere Behandlungen (3 und 4) in 2 anderen Blocks. Wie wir später in Kapitel 4 sehen werden, können wir den Gesamtversuch nicht durch *eine* Varianzanalyse auswerten, das kann lediglich für beide Versuchsteile getrennt geschehen.

In diesem Zusammenhang wollen wir für den Rest des Buches lediglich vollständige oder zusammenhängende unvollständige Blockanlagen betrachten, vor allem die im folgenden Abschnitt eingeführten BUB.

## 2.6.2 Vollständig balancierte unvollständige Blockanlagen

### Definition 2.16

Eine (vollständig) balancierte unvollständige Blockanlage (BUB) ist eine block- und wiederholungsgleiche unvollständige Blockanlage mit der zusätzlichen Eigenschaft, dass jedes Paar von Behandlungen in gleich vielen, nämlich in  $\lambda$ , Blocks auftritt. Besitzt eine BUB  $v$  Behandlungen mit  $r$  Wiederholungen in  $b$  Blocks der Größe  $k < v$ , so bezeichnen wir sie mit  $B(v, k, \lambda)$ -Anlage.

Im Symbol  $B(v, k, \lambda)$  treten nur drei der fünf Parameter  $v, b, k, r, \lambda$  einer BUB auf. Dies ist ausreichend, da nur drei der fünf Parameter frei wählbar sind, die beiden anderen liegen dann automatisch fest. Das sieht man wie folgt: Die Anzahl von

mögliche Behandlungspaare in der Anlage ist gleich  $\binom{v}{2} = \frac{v(v-1)}{2}$ . Andererseits

gibt es in jedem der  $b$  Blocks genau  $\binom{k}{2} = \frac{k(k-1)}{2}$  Behandlungspaare und daher gilt:

$$\lambda v(v-1) = bk(k-1)$$

wenn jedes der  $\binom{v}{2}$  Behandlungspaare  $\lambda$  mal in dem Versuch auftritt (nach Definition muss dies in einer BUB eine Konstante sein). Nach Formel (2.5) ersetzen wir  $bk$  durch  $vr$  und erhalten (nach Division durch  $v$ ):

$$\lambda(v-1) = r(k-1) \quad (2.6)$$

Die Gleichungen (2.5) und (2.6) sind notwendige Bedingungen für die Existenz einer BUB. Diese notwendigen Bedingungen reduzieren die Menge möglicher Quintupel ganzer Zahlen  $v, b, r, k, \lambda$  auf eine Teilmenge solcher ganzer Zahlen für die die Bedingungen (2.5) und (2.6) erfüllt sind. Charakterisieren wir eine BUB durch drei dieser Parameter, z.B. durch  $\{v, k, \lambda\}$ , so können die restlichen Parameter mit Hilfe der Gleichungen (2.5) und (2.6) berechnet werden.

Wir weisen darauf hin, dass die notwendigen Bedingungen nicht immer hinreichend für die Existenz einer BUB sind. Um das zu zeigen, reicht ein Gegenbeispiel.

### Beispiel 2.8

In diesem Beispiel wird gezeigt, dass die Bedingungen, die für die Existenz einer BUB notwendig sind, nicht auch hinreichend sein müssen. Die Werte  $v = 16, r = 3, b = 8, k = 6, \lambda = 1$  erfüllen wegen  $16 \cdot 3 = 8 \cdot 6$  und  $1 \cdot 15 = 3 \cdot 5$  die notwendigen Bedingungen für die Existenz einer BUB, trotzdem gibt es keine BUB mit dieser Parameterkombination.

Neben (2.5) und (2.6) gibt es eine weitere notwendige Bedingung, die Fishersche Ungleichung, nach der stets

$$b \geq v \quad (2.7)$$

gelten muss.

Diese Ungleichung ist in Beispiel 2.8 nicht erfüllt. Aber auch wenn (2.5), (2.6) und (2.7) gelten, muss nicht immer eine BUB existieren.

### Beispiel 2.8 - Fortsetzung

Benötigt man eine BUB für  $v = 16$  Behandlungen, stehen Blocks mit  $k = 6$  Versuchseinheiten zur Verfügung und sucht man eine BUB mit so wenig Blocks wie möglich, so kann man sich die "kleinste" BUB mit dem Zweig Versuchsanlagen von CL in Abbildung 2.1 erzeugen, indem wir mit "balancierte Blockanlage" fortsetzen. Wir füllen das dann erscheinende Eingabefenster entsprechend aus (Abbildung 2.5) und erhalten das Ergebnis in Abbildung 2.6.

**Balancierte Blockanlage**

Eine Blockanlage dient zur Ausschaltung einer Störgröße. In einem Blockversuch mit  $k$  Versuchseinheiten pro Block, werden  $v$  Behandlungen untersucht.

Parameter der Blockanlage

Anzahl der Behandlungen ( $v$ ) 16

Blockgröße ( $k$ ) 6

Typ der Blockanlage BUB

OK Abbruch Hilfe

**Abbildung 2.5** Eingabefenster zur zufälligen Zuordnung von 16 Behandlungen in 16 unvollständige Blocks vom Umfang  $k=6$

**Entscheidung:**  
Konstruktion einer balancierten unvollständigen Blockanlage

Zuordnungstabelle

| Block | Behandlungen     |
|-------|------------------|
| 1     | 2 3 4 5 6 11     |
| 2     | 3 4 10 12 15 16  |
| 3     | 1 3 6 7 8 14     |
| 4     | 3 5 8 9 13 15    |
| 5     | 1 2 6 9 10 15    |
| 6     | 1 4 5 7 14 15    |
| 7     | 1 5 7 9 11 12    |
| 8     | 4 6 7 9 13 16    |
| 9     | 1 4 8 10 11 13   |
| 10    | 5 6 8 10 12 16   |
| 11    | 1 2 3 12 13 16   |
| 12    | 2 7 8 11 15 16   |
| 13    | 2 12 4 8 9 14    |
| 14    | 9 10 11 3 14 16  |
| 15    | 2 5 7 10 13 14   |
| 16    | 6 11 12 13 14 15 |

+

**Abbildung 2.6** Ergebnisbild zur Eingabe in Abbildung 2.5 mit  $b = 16$ ,  $r = 6$  und  $\lambda = 2$

Man kann stets eine BUB (eine sogenannte unreduzierte oder triviale BUB) für beliebige positive ganze Zahlen  $v$  und  $k < v$  erhalten, indem man alle möglichen Kombinationen von  $v$  Elementen in  $k$  Klassen aufschreibt. Folglich ist dann  $b = \binom{v}{k}$ ,

$r = \binom{v-1}{k-1}$  und  $\lambda = \binom{v-2}{k-2}$ . Meist lässt sich eine BUB mit weniger Blocks als

Teilmenge einer solchen unreduzierten BUB finden. Ein Fall, für den eine solche Reduktion nicht möglich ist, ist der mit  $v=8$  und  $k=3$ . Dies ist der einzige Fall für  $v \leq 25$  und  $2 < k < v-1$ , für den keine kleinere BUB existiert als die triviale.

Mitunter verwendet man sogenannte teilweise balancierte unvollständige Blockanlagen (TBUB), die analog zu den BUB definiert sind aber zwei (oder auch mehrere) Klassen von Behandlungspaaren zulassen, die jeweils in gleich vielen Blocks auftreten. Sie lassen sich mit CL konstruieren, siehe auch VB 1/21/4150 - 1/21/4162.

## 2.7 Faktorielle Pläne

Die klassische Methode für die Untersuchung der Effekte mehrerer Faktoren besteht darin, einen Faktor zu variieren und die übrigen auf einer Stufe fest einzustellen. Abgesehen davon, dass solch ein Vorgehen viel Zeit und Geld kostet, können etwaige Wechselwirkungen zwischen den Faktoren nicht erkannt werden. Diese Tatsache veranlasste R.A. FISHER und F. YATES zur Entwicklung der Theorie sogenannter faktorieller Versuche. Versuche dieser Art gestatten die gleichzeitige Variation der Stufen mehrerer Faktoren. Wir geben zunächst ein Beispiel.

### Beispiel 2.9

Es sollen die Effekte verschiedener Dosierungen von Phosphor- und Stickstoffdünger auf den Ertrag  $y$  einer Weizensorte untersucht werden. In einem Düngungsversuch wird der Faktor  $P$  (Phosphordünger) mit den Stufen  $P_1$ ,  $P_2$  und  $P_3$ , und der Faktor  $S$  (Stickstoffdünger) auf den Stufen  $S_1$  und  $S_2$  eingesetzt. Jedes von  $6r$  Teilstücken eines Versuchsfeldes wird mit einer der Faktorstufenkombinationen  $P_1S_1$ ,  $P_1S_2$ ,  $P_2S_1$ ,  $P_2S_2$ ,  $P_3S_1$  und  $P_3S_2$  behandelt, d.h. wir haben  $v = 6$  Behandlungen. Dabei wird  $r$  in Abhängigkeit von der Genauigkeitsvorgabe mit den Methoden von Kapitel 3 (bzw. 4 oder 5) bestimmt. Die  $r \cdot 6$  Teilstücke können darüber hinaus zu Blocks gleicher Bodenqualität im Sinne von Abschnitt 2.5 zusammengefasst werden, damit käme zu den Behandlungsfaktoren noch ein Störfaktor hinzu.

Wir wollen mit den Bezeichnungen von Beispiel 2.9 erklären, was man unter Wechselwirkungen versteht. Von einer Wechselwirkung spricht man immer dann, wenn die Wirkung, die der Übergang von einer Stufe zu einer anderen Stufe eines bestimmten Faktors auf das beobachtete Merkmal hat, davon abhängt, auf welchen Stufen die übrigen Faktoren eingestellt sind. Die Anzahl der an diesem Phänomen beteiligten (übrigen) Faktoren definiert die Ordnung der Wechselwirkung. In Beispiel 2.9 liegt zum Beispiel eine Wechselwirkung 1. Ordnung vor, wenn die Wirkung des Übergangs von  $P_1$  nach  $P_2$  auf den durchschnittlichen Ertrag davon abhängt, ob bei der Stickstoffdüngung die Stufe  $S_2$  oder die Stufe  $S_1$  angewendet wurde.

Allgemein treten in einem faktoriellen Versuch Kombinationen von mindestens zwei Behandlungsfaktoren auf, sie werden mit  $A, B, C, \dots$ , und ihre Stufen mit  $A_1, A_2, \dots, B_1, B_2, \dots$ , und so weiter bezeichnet. Die Kombinationen der Stufen aller Behandlungsfaktoren sind die Behandlungen. Andere Faktoren, die nicht untersucht werden sollen, heißen Störfaktoren, die durch Blockbildung oder anderweitig berücksichtigt werden können. Ziel faktorieller Versuche ist die Schätzung von Behandlungseffekten und deren Komponenten in einem statistischen Modell, dessen Parameter ebenfalls geschätzt oder getestet werden sollen. Die Stufen der Faktoren werden fest vorgegeben, ebenso ihre Anzahl. Die Faktoren können qualitativ oder quantitativ sein.

### Definition 2.17

Ein faktorieller Versuch mit  $p > 1$  Faktoren  $A, B, \dots$  und den entsprechenden Anzahlen von Faktorstufen  $s_a, s_b, \dots$  heißt ein faktorieller Versuch vom Typ  $s_a \cdot s_b \cdot \dots$ . Gilt  $s = s_a = s_b = \dots$ , so heißt der Versuch ein symmetrischer faktorieller Versuch vom Typ  $s^p$ , anderenfalls ist er asymmetrisch.

Wir beschränken uns zur Vereinfachung der Darstellung im Folgenden auf  $p = 3$  Faktoren  $A, B, C$ , für den allgemeinen Fall verweisen wir auf VB 1/21/4800-1/21/4825. Die Stufen von  $A, B$  bzw.  $C$  nennen wir  $A_i, B_j$  bzw.  $C_k$  ( $i = 1, \dots, s_a; j = 1, \dots, s_b; k = 1, \dots, s_c$ ).

### Definition 2.18

Die *Versuchsanlage* eines faktoriellen Versuches mit  $p = 3$  Faktoren gibt für jede mögliche Kombination  $(A_i, B_j, C_k)$  der Stufen dieser Faktoren die Anzahl  $n_{ijk}$  der Versuchseinheiten an, die dieser Kombination von Stufen zugeordnet sind. Die Gesamtanzahl  $N = \sum_{ijk} n_{ijk}$  von Versuchseinheiten ist der Versuchsumfang.

### Definition 2.19

Ein faktorieller Versuch heißt vollständig falls alle  $n_{ijk} > 0$  sind, fehlt mindestens eine der möglichen Faktorstufenkombinationen, so heißt er unvollständig.

Unter den unvollständigen faktoriellen Versuchen spielen bei qualitativen Faktoren die fraktionierten faktoriellen Versuche eine besondere Rolle, sie bestehen aus einem  $k$ -tel ( $k = 2, 3, \dots$ ) aller möglichen Faktorstufenkombinationen. Fraktionierte faktorielle Versuche werden eingesetzt, wenn viele Faktoren in einem Versuch auftreten. Da die Anzahl möglicher Stufenkombinationen schnell mit der Anzahl der Faktoren steigt, stehen meist nicht ausreichend viele Versuchseinheiten für einen vollständigen Versuch zur Verfügung. Ein unvollständiger faktorieller Versuch hat zur Folge, dass die Effekte nicht aller definierbaren Haupt- und Wechselwirkungen einzeln geschätzt werden können sondern teilweise nur Summen solcher Wirkungen. Man nennt dies Vermengen. Man ist bestrebt, möglichst keine Hauptwirkungen und keine Wechselwirkungen niedriger Ordnung miteinander zu vermengen. Man nimmt allgemein an, dass Wechselwirkungen höherer Ordnung vernachlässigbare Effekte besitzen und daher miteinander vermengt werden können.

Die Konstruktion fraktionierte faktorieller Versuche für vorgegebene Vermengungsstrukturen kann für bis zu  $p = 9$  Faktoren mit 2 oder 3 Stufen mit dem CL-Programm durchgeführt werden, nach Wahl des Zweiges Versuchsanlagen findet man die entsprechenden Wege.

Das statistische Modell faktorieller Versuche ist bei qualitativen Faktoren meist ein Modell I der Varianzanalyse nach Kapitel 4 und bei quantitativen Faktoren meist ein Modell I der Regressionsanalyse nach Kapitel 5.

Ein anderer Typ von unvollständigen faktoriellen Versuchen mit quantitativen Faktoren sind die zentral zusammengesetzten Pläne 2. Ordnung, siehe hierzu Abschnitt 5.7 und VB 4/33/1250.

## 2.8 Optimale Wahl des Untersuchungsumfanges

In Kapitel 3 wird bei der Beschreibung eines statistischen Verfahrens meist mit der Festlegung des Untersuchungsumfanges begonnen und anschließend die Auswertungsmethode beschrieben. Man strebt natürlich danach, mit möglichst wenigen Beobachtungen dennoch eine gewünschte Genauigkeit zu erreichen. Die Art der Vorgabe der Genauigkeit hängt sehr stark von der Art des Auswertungsverfahrens ab und sieht bei Punktschätzungen anders aus als bei der Konstruktion von Konfidenzintervallen oder bei Auswahlverfahren oder statistischen Tests.

An dieser Stelle wollen wir nicht auf Einzelheiten eingehen sondern auf ein allgemeines Problem hinweisen, vor dem ein Wissenschaftler steht, wenn er den Untersuchungsumfang berechnet hat. Wir empfehlen, diesen Abschnitt noch mal zu lesen, wenn man die folgenden Kapitel (zumindest teilweise) kennt und erlauben uns hier, etwas auf diese Kapitel vorzugreifen.

Selten verfolgt man bei einer Untersuchung nur ein Ziel. Man misst mitunter nicht nur ein Merkmal an den Untersuchungseinheiten sondern mehrere Merkmale gleichzeitig (oder kurz hintereinander). Auch hat man oft nicht nur eine Auswertung im Sinn. Neben der Berechnung von Abhängigkeiten zwischen Merkmalen etwa mit der Regressionsanalyse möchte man aber auch die Mittelwerte der Merkmale berechnen und eventuell unter verschiedenen Untersuchungsbedingungen vergleichen. In einer zweifachen Varianzanalyse mit zwei festen Faktoren mit z. B. 4 bzw. 6 Stufen ist es für die Größe des Untersuchungsumfanges wesentlich, festzulegen, ob man die 4 Stufen des einen oder die 6 Stufen des anderen festen Faktors auf gleiche Wirkung testen will.

Das alles führt meist dazu, dass sich für unterschiedliche Fragestellungen oder für verschiedene Merkmale auch **unterschiedliche** Untersuchungsumfänge ergeben. In einer Untersuchung muss man dann aber letztlich **einen** Umfang festlegen.

Um aus diesem Dilemma herauszukommen kann man einen der beiden folgenden Wege beschreiten.

- Man einigt sich entweder mit an der Untersuchung Beteiligten (den Auftraggebern) (zur Not auch mit sich selbst), welches der wichtigste Aspekt ist, dem sich der Gesamtumfang unterzuordnen hat und ermittelt den Versuchsumfang für eben diesen Aspekt
- Zunächst wird der Untersuchungsumfang für jedes Merkmal und jede Aufgabenstellung gesondert ermittelt. Dann arbeitet man mit dem Maximum und ist für alle Teilaspekte auf der sicheren Seite. Natürlich gibt es auch Fälle, in denen man auf teure Messungen eines Merkmals, wenn sie nicht erforderlich sind, bei einigen Untersuchungseinheiten verzichten kann.
